# Supplementary material
Source: publisher site journal article supplement (https://en-cdn.bio-protocol.org/attached/file/20210201/3935%20Supplementary%20Material.docx)
Supplement: Supplementary file 1 [file 3935%20Supplementary%20Material.docx]

**Supplementary Material**

1. R-script “matrix.fun” for "matrixing" binary CE/LIF-files.

#matrix.fun.R

#version 2020/11/10

#Creates matrix from binary CE/LIF-files

#Input = character vector of ab1-files (& path) from "oneDye" reactions

#Output: matrix with channels in columns, contributions in rows.

#Matrix is simultaneously exported as tab-delimited text file.

#Adapted to ABI PRISM® 310 DNA-Sequencer with a 50cm glass capillary

#and a module recording 2000 - 2500 data points for 4 channel).

#For other modules, the region used for background estimation

#defined by "llimbg" and "ulimbg", number of channels can be adjusted.

#usage example:

#matrix.fun(c(abidye1.ab1, abidye2.ab1), "mymatrix.txt")

#matrix is displayed in console

#mymatrix <- matrix.fun(c(abidye1.ab1, abidye2.ab1), "mymatrix.txt")

#generates R object

matrix.fun <- function(abifiles, outfile = "matrix.txt", valsat = 8191,

llimbg = 500, ulimbg = 2000 {

#initialize matrix as identity matrix

mymat <- diag(4)

for (myabi in abifiles) {

#read binary CE/LIF file

datafile <- read.abif(myabi)

#extract raw RFU data

cedata <- data.matrix(data.frame(datafile@data$DATA.1,datafile@data$DATA.2,

datafile@data$DATA.3,datafile@data$DATA.4))

#perform baseline correction

for (i in 1:ncol(cedata)) {

cedata[,i] <- cedata[,i] - median(cedata[llimbg:ulimbg,i])

}

#identify dye (= channel)

tmpmax <- c()

for (i in 1:ncol(cedata)) {

tmpmax[i] <- max(cedata[,i])

}

channel <- which(tmpmax == max(tmpmax))

#select data points for calculation of contribution of channels to signal

tmpselected <- cedata[which(cedata[,channel] < valsat &

cedata[,channel] > 0.2*max(cedata[,channel])), ]

#calculate contributions

for(i in 1:nrow(tmpselected)) {

tmpselected[i,] <- tmpselected[i,]/sum(tmpselected[i,])

#average over datapoints

matdye <- c()

for(j in 1:ncol(tmpselected)){

matdye[j] <- mean(tmpselected[,j])

}

#add data to matrix

mymat[,channel] <-t(matdye)

}

}

#save matrix to file

write.table(data.frame(mymat), file = outfile , append = F,

sep = "\t", dec = ".", row.names = F, col.names = F, quote = F)

return(mymat)

}
